# Supplementary material
Source: PubMed Central journal article supplement (PMC2711837)

## **SUPPLEMENTAL MATERIALS AND METHODS**

### **Generation of MEFs, osteoblasts and cell culture**

*Prkar1a*<sup>-/-</sup> and control MEFs were generated and cultured as described (Nadella and Kirschner, 2005). Briefly, parallel MEF cultures were isolated from single littermate embryos and genotyped. *Prkar1a*<sup>+/+</sup> and *Prkar1a*<sup>loxP/loxP</sup> MEFs were treated with retroviral cre to produce *Prkar1a*(WT) and *Prkar1a*(KO) lines, respectively. Tumor and normal osteoblasts from tail tumors of *Prkar1a*<sup>+/-</sup> and wild type mice were prepared and cultured as described (Pavel et al., 2008). All cells were routinely cultured in Dulbecco's modified Eagle's medium with 10% fetal bovine serum.

### **Cell migration**

Cell migration was performed as described (Saji et al., 2005). Briefly, cells were collected in DMEM/0.2% FBS and adjusted to 10<sup>5</sup>/ml for WT and 8L and 2 x 10<sup>5</sup>/ml for 2L and 300 μL of the cell suspension were seeded in upper chamber of a Boyden Chamber. After 1 hour, cells were stimulated to migrate by placement in wells containing DMEM/5%. After 6 hours of migration, the reaction was terminated and the samples quantitated as described. PKI treatment (10 uM) included a 30 min pre-treatment and fresh drug during the migration period. The basal migration experiments were repeated 4-6 times each, and the PKI studies were repeated 3-4 times each.

### **Wound-healing assays**

Wound-healing assays were performed with the ECIS 1600R (Applied BioPhysics, Troy, NY). For these studies, 40,000 cells were cultured on ECIS eight-well culture dish (ECIS

8W1E plate). After the cells were grown to confluence, the cells are subjected to an elevated voltage pulse of 40-kHz frequency, 3.5-V amplitude, and 30-s duration, which led to death and detachment of cells present on the small active electrode, resulting in a wound normally healed by cells surrounding the small active electrode that have not been submitted to the elevated voltage pulse. Wound healing was then assessed by continuous resistance measurements for 48h. The migration abilities of three different Prkar1a knock out MEFs were compared to the wild type MEFs obtained from the same litter.

### **Statistical Analysis**

All analysis was performed by using GB-STAT (Dynamic Microsystems, Inc., Silver Spring, MD). Percent migration was analyzed by ANOVA and significance was analyzed by using Bonferroni/Dunn's methods.

Supplementary Table 1  
Phylogenetic conservation of PKA phosphorylation sites in Limk1 and Limk2

|                       |  |     |                                                                      |
|-----------------------|--|-----|----------------------------------------------------------------------|
|                       |  | 323 |                                                                      |
|                       |  |     |                                                                      |
| Hs LIMK1 <sup>1</sup> |  |     | rspgagslgspasqrkdlgrse <b>s</b> lrvv.crphrifrpsdlihgevlgkkgcfcggaikv |
| Mm Limk1              |  |     | tspgtsslaspasqrkdlgrse <b>s</b> lrvv.crphrifrpsdlihgevlgkkgcfcggaikv |
| Pt Limk1              |  |     | rspgagslgspasqrkdlgrse <b>s</b> lrvv.crphrifrpsdlihgevlgkkgcfcggaikv |
| Rn Limk1              |  |     | tspgagslvspasqrkdlgrse <b>s</b> lrvv.crphrifrpsdlihgevlgkkgcfcggaikv |
| Gg Limk1              |  |     | kspgsssvgspasqrkdigrse <b>s</b> lrvv.srahrifrpsdlihgevlgkkgcfcggaikv |
| Dr Limk1              |  |     | kspssssapsplslrkdigrse <b>s</b> lrgvsnrthrifrasdlihgevlgtgcfgggaikv  |
| Dm Limk               |  |     | deqhqaqqhsahpqlydlrtq <b>s</b> crvv.qkqqrifratdlvigeklgegffgkvfkv    |
|                       |  |     |                                                                      |
| Hs Limk2              |  |     | kspgpsspkellfsrdisrse <b>s</b> lrcsssysqqifrpcdlihgevlgkkgffggaikv   |
| Mm Limk2              |  |     | kspgpsspkelllsrdisrse <b>s</b> lrcsssysqqifrpcdlihgevlgkkgffggaikv   |
| Rn Limk2              |  |     | kspgpsspkelllsrdisrse <b>s</b> lrcsssysqqifrpcdlihgevlgkkgffggaikv   |
| Gg limk2              |  |     | kspgpsspkelllsrdisrse <b>s</b> lrsssscsqqifrpcdlihgevlgkkgffggaikv   |
| Dr Limk2              |  |     | kspvssspkdhvlvtrdigrse <b>s</b> lrspsccshrifrpcdlihgeilgkkgffggaikv  |
|                       |  |     |                                                                      |
|                       |  | 596 |                                                                      |
|                       |  |     |                                                                      |
| Hs LIMK1              |  |     | prtmdfglnvrgfldrycppncppsffpitvrcclddpekrs <b>s</b> fvklehwlletl     |
| Mm Limk1              |  |     | prtmdfglnvrgfldrycppncppsffpitvrcclddpekrs <b>s</b> fvkleqwlletl     |
| Pt Limk1              |  |     | prtmdfglnvrgfldrycppncppsffpitvrcclddpekrs <b>s</b> fvklehwlletl     |
| Rn Limk1              |  |     | prtmdfglnvrgfldrycppncppsffpitvrcclddpekrs <b>s</b> fvkleqwlletl     |
| Gg Limk1              |  |     | prttdfglnvrgflerycppacppsffpiaaccdddpekrs <b>s</b> fskleqwlletl      |
| Dr Limk1              |  |     | praldfglntavfleehcpadcpaaffpiaalccdddaekrpa <b>f</b> tkleswledl      |
| Dm Limk               |  |     | mprnsdfslnqqefrekfcaqcpepfvkvavfccdlndmrc <b>f</b> etlhvwlqrl        |
|                       |  |     |                                                                      |
| Hs Limk2              |  |     | prtldfglnvklfwekfvptdcpaffplaaiccrlepesrpa <b>f</b> skledsfeal       |
| Mm Limk2              |  |     | prtldfglnvklfwekfvptdcpaffplaaiccklepesrpa <b>f</b> skledsfeal       |
| Rn Limk2              |  |     | prtldfglnvklfwekfvptdcpaffplaaiccklepesrpa <b>f</b> skledsfeal       |
| Gg Limk2              |  |     | prtldfglnvklfwekfvpadcpaffplaaiccrlepesrpa <b>f</b> skledsfeal       |
| Dr Limk2              |  |     | prtldfglnvrtfiekflpehcppaffalavaccdltpdnrpa <b>f</b> qkledcfeal      |

<sup>1</sup> Abbreviations and accession numbers of sequences are as follows:

| Abbrev. | Species                        | Limk1        | Limk2        |
|---------|--------------------------------|--------------|--------------|
| Hs      | <i>Homo sapiens</i>            | NP_002305    | NP_001026971 |
| Mm      | <i>Mus musculus</i>            | NP_034847    | NP_001029202 |
| Pt      | <i>Pan troglodytes</i>         | XP_001148746 | --           |
| Rn      | <i>Rattus norvegicus</i>       | NP_113915    | NP_077049    |
| Gg      | <i>Gallus gallus</i>           | NP_989462    | NP_990446    |
| Dr      | <i>Danio rerio</i>             | NP_001036156 | NP_001002651 |
| Dm      | <i>Drosophila melanogaster</i> | NP_511139    | --           |

## SUPPLEMENTAL FIGURE LEGENDS

**Supplemental Figure 1.** Loss of Prkar1a enhances cell migration measured by the Electronic Coupled Impedance Sensing (ECIS) assay. **a.** ECIS analysis of migration of 3 independent *Prkar1a*<sup>-/-</sup> MEF cell lines compared to WT (*Prkar1a*<sup>+/+</sup>) cells.

**Supplemental Figure 2.** Enhanced pCofilin and migration are observed in primary cultures of *Prkar1a*<sup>+/-</sup> tumor osteoblasts. **a.** Western blotting of pCofilin and Limk1 from primary cultures of normal osteoblasts (N1-4) or 5 independent tumors (T1-5). Actin is shown as a loading control. **b.** ECIS analysis of migration of primary osteoblasts isolated from 3 WT mice and 3 independent *Prkar1a*<sup>+/-</sup> bone tumors. Note that sample 1 (WT) and sample 5 (Tumor) were not subject to voltage-induced monolayer wounding.

**Supplemental Figure 3.** PKA activation causes morphologic changes at low cell density. **Left.** WT cells at low density in normal medium. **Middle.** WT cells at low density after 24 hours treatment with 50 uM Forskolin (FSK). **Right.** KO cells at low density. Note the significant number of the cells in the center panel which exhibit the same morphology as KO cells.

**Supplemental Figure 4.** PKA-C enhances Limk1-mediated phosphorylation of Cofilin. Autoradiogram of *in vitro* kinase assay demonstrating that PKA-C phosphorylates

Limk1 and enhances its ability to phosphorylate of Cofilin. Note that the background level of Cofilin visualization observed in the first lane is not PKA-C dependent.

**Supplemental Figure 5.** PKA-C enhances Limk1-mediated phosphorylation of Cofilin *in vivo*. Immunoblot showing the effects of PKA and Limk1 transfected individually or together on Cofilin phosphorylation in intact 293T cells. PTEN is shown as a loading control. Note that the level of pCofilin is much higher in the co-transfected cells than in cells transfected with either kinase by itself.

# Supplemental Figure 1 Nadella et al

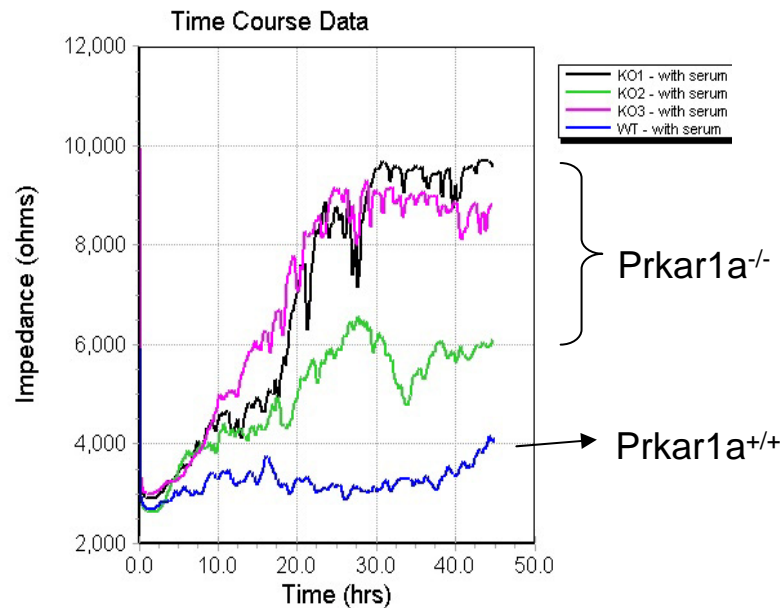

**Supplemental Figure 1.** Loss of Prkar1a enhances cell migration measured by the Electronic Coupled Impedance Sensing (ECIS) assay. **a.** ECIS analysis of migration of 3 independent *Prkar1a*<sup>-/-</sup> MEF cell lines compared to WT (*Prkar1a*<sup>+/+</sup>) cells.

# Supplemental Figure 2 Nadella et al

**a**

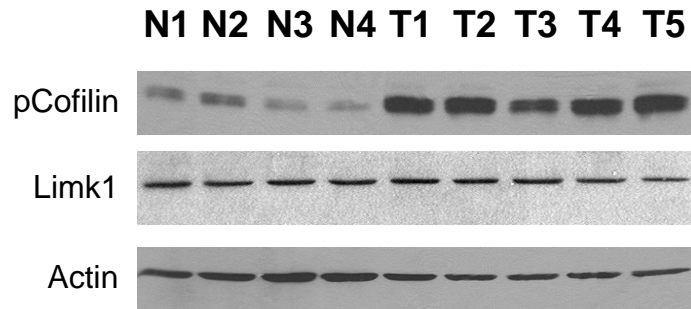

**b**

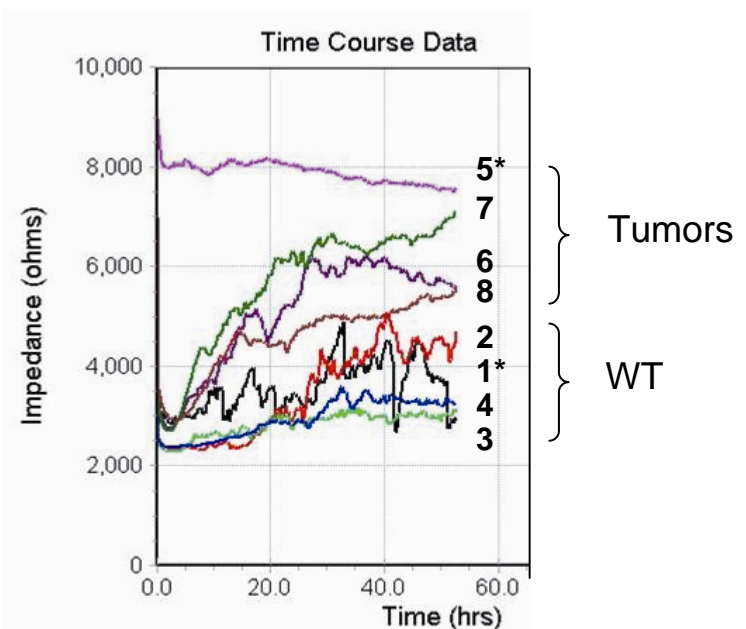

**Supplemental Figure 2.** Enhanced pCofilin and migration are observed in primary cultures of *Prkar1a*<sup>+/-</sup> tumor osteoblasts. **a.** Western blotting of pCofilin and Limk1 from primary cultures of normal osteoblasts (N1-4) or 5 independent tumors (T1-5). Actin is shown as a loading control. **b.** ECIS analysis of migration of primary osteoblasts isolated from 3 WT mice and 3 independent *Prkar1a*<sup>+/-</sup> bone tumors. Note that sample 1 (WT) and sample 5 (Tumor) were not subject to voltage-induced monolayer wounding.

# Supplemental Figure 3 Nadella et al

MEFs

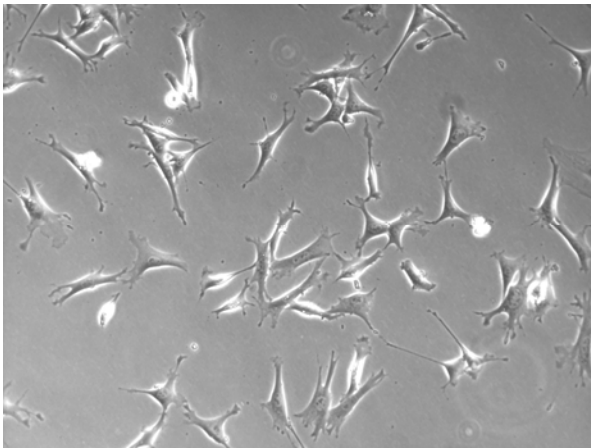

*Prkar1a*<sup>+/+</sup>

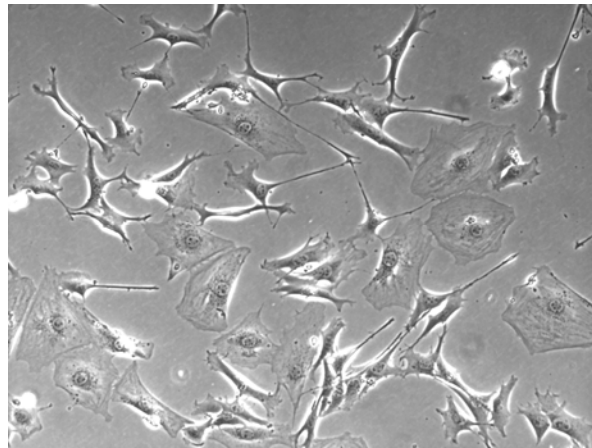

*Prkar1a*<sup>+/+</sup> with FSK

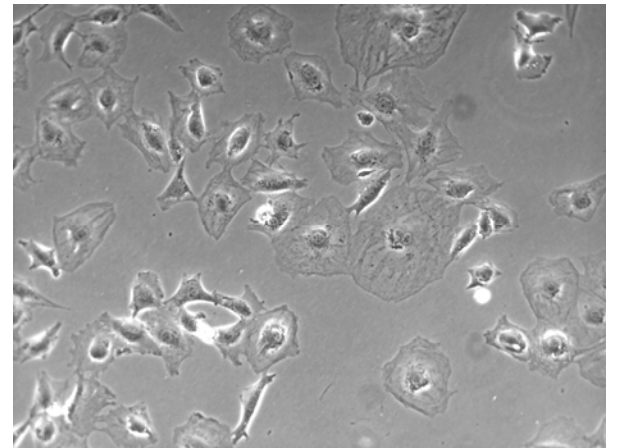

*Prkar1a*<sup>-/-</sup>



# Supplemental Figure 4 Nadella et al

|                |   |   |   |
|----------------|---|---|---|
| <i>Limk1</i>   | - | + | + |
| <i>Cofilin</i> | + | + | + |
| <i>PKA-C</i>   | - | - | + |

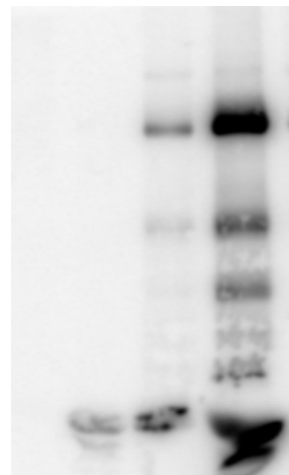

GST-Limk1

GST-Cofilin

# Supplemental Figure 5 Nadella et al

293T cells

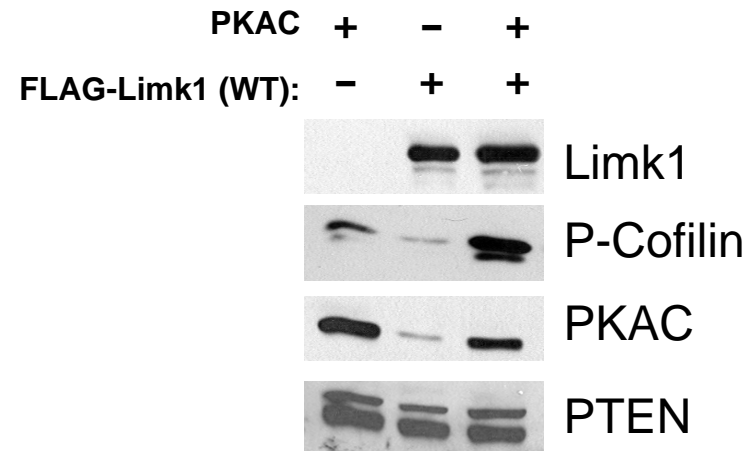

Supplement: embor200958-s1.pdf [file embor200958-s1.pdf]
